# Supplementary material
Source: PubMed Central journal article supplement (PMC7340147)
Supplement: NIHMS1595463-supplement-1.pdf [file NIHMS1595463-supplement-1.pdf]

# Supporting Information

Giacomo M. Di Mauro<sup>1</sup>, Nathaniel Z. Hardin<sup>1</sup>, Ayyalusamy Ramamoorthy<sup>1,2,\*</sup>

<sup>1</sup>Department of Chemistry, University of Michigan, Ann Arbor, MI, 48109-1055 (USA)

<sup>2</sup>Biophysics and Chemistry Department, Macromolecular Science and Engineering, and Biomedical Engineering, University of Michigan, Ann Arbor, MI, 48109-1055 (USA)

\*Corresponding author:

Ayyalusamy Ramamoorthy, Email: ramamoor@umich.edu

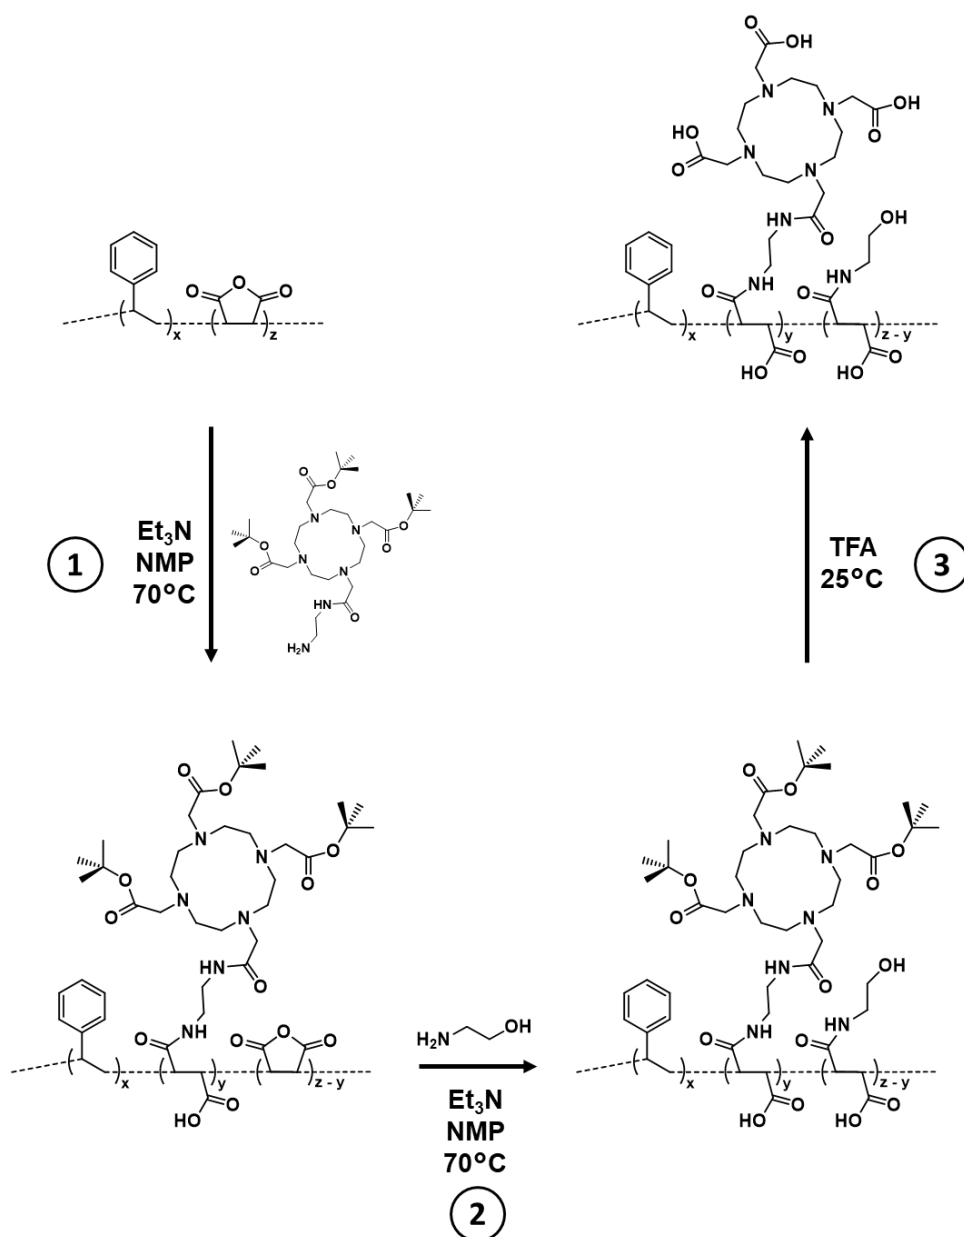

**Figure S1. Reaction scheme for the synthesis of SMA-EA-DOTA:** 1) The nucleophilic ring opening reaction using DOTA-t-butyl-acetate. 2) Nucleophilic ring opening reaction using ethanolamine. 3) TFA deprotection of DOTA.

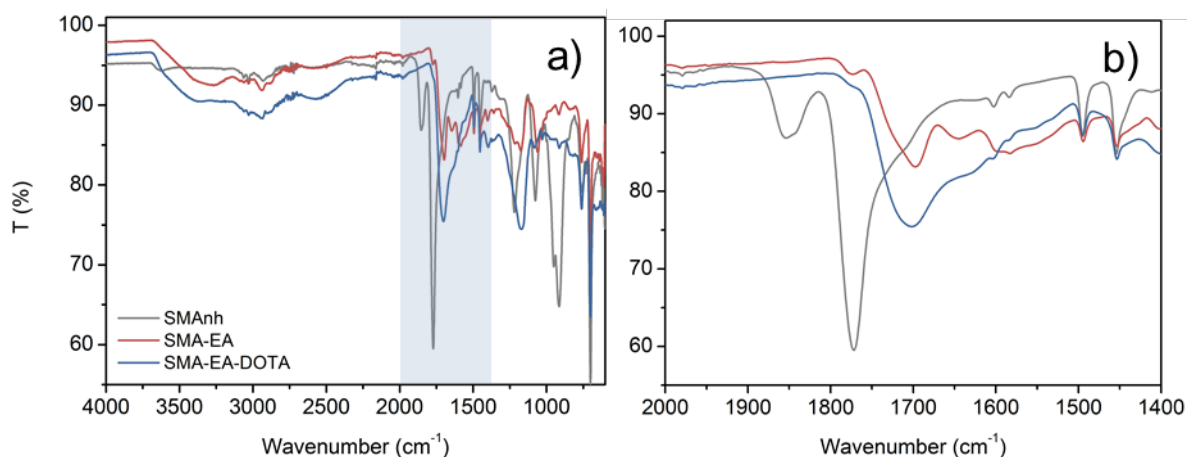

**Figure S2. FT-IR spectra of copolymers.** a) SMAh, SMA-EA, and SMA-EA-DOTA; b) Expanded regions showing the C=O stretching frequency (2000-1400  $\text{cm}^{-1}$ ).

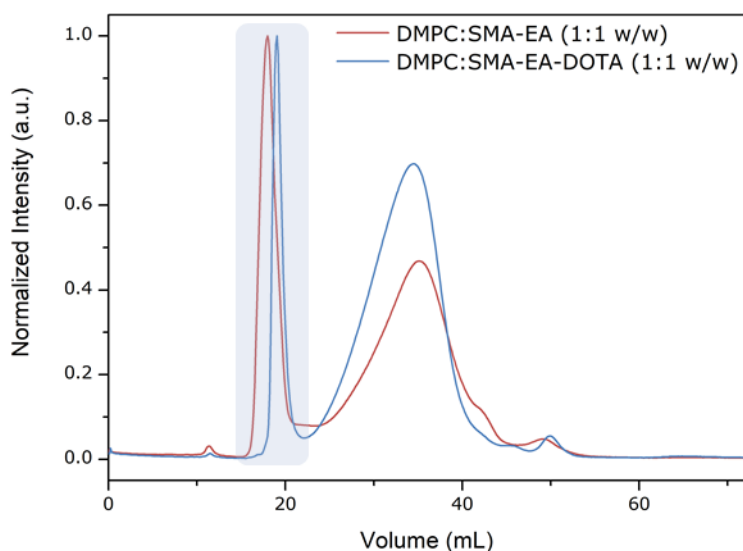

**Figure S3. SEC Chromatograms of polymer-nanodiscs.** 1:1 w/w DMPC: SMA-EA (red) and DMPC: SMA-EA-DOTA (blue) nanodiscs elution at room temperature.

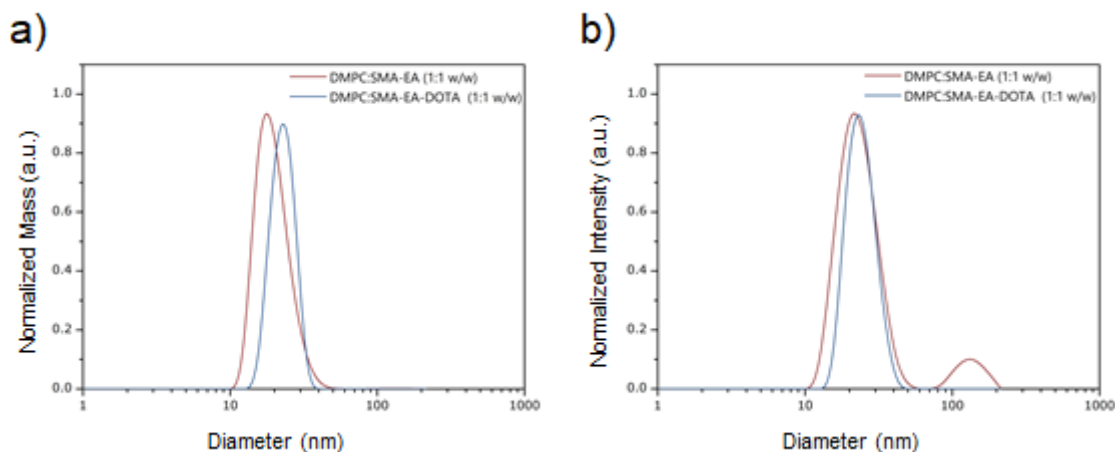

**Figure S4. DLS of nanodiscs.** DLS profiles of 1:1 w/w DMPC:SMA-EA (in red) and DMPC:SMA-EA-DOTA (in blue). a) The mass profiles, and b) intensity profiles. Both were obtained on samples passed through SEC.

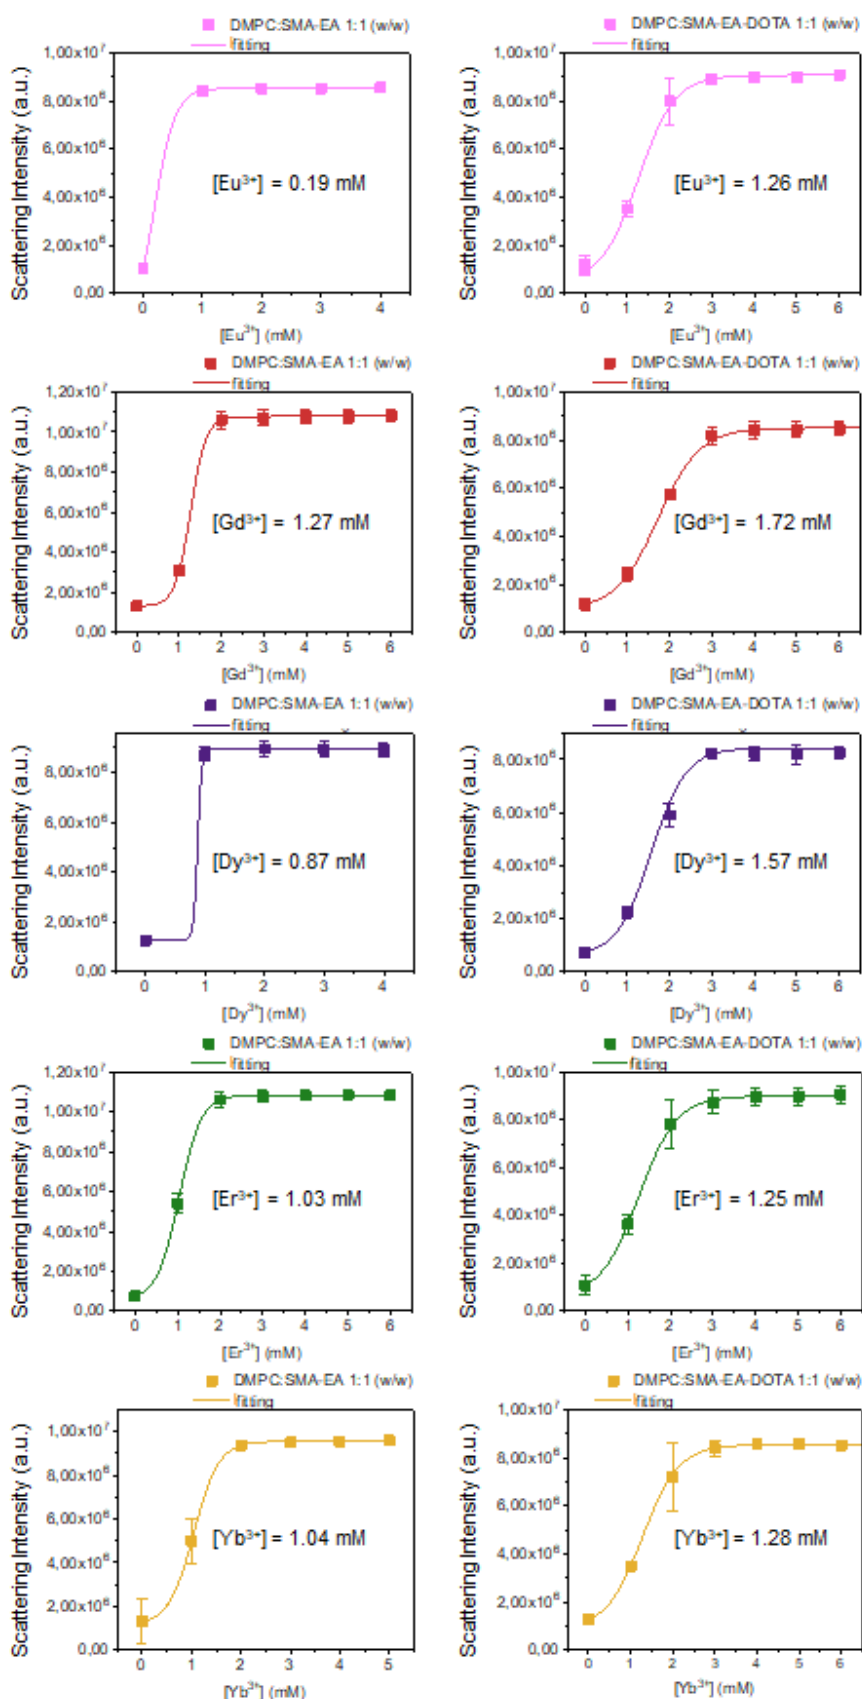

**Figure S5. Static Light Scattering metal titrations.** SLS traces obtained by titrating 1 mg of SMA-EA nanodiscs (left column) and SMA-EA-DOTA nanodiscs (right column) with a solution of varying metal ion concentration. The concentration values were obtained by fitting the experimental points, obtained in triplicate.

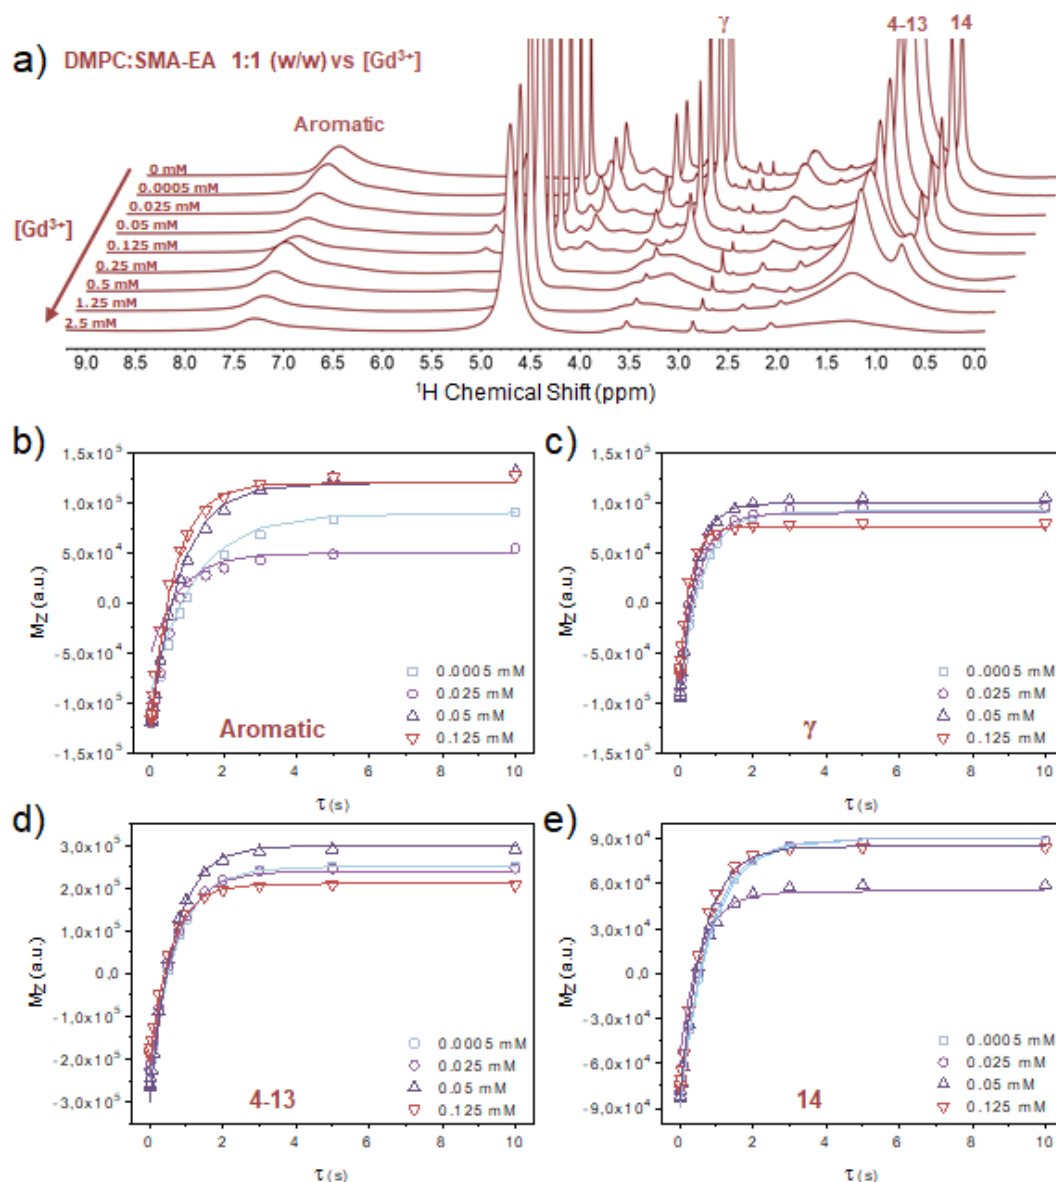

**Figure S6.**  $T_1$  measurements for DMPC: SMA-EA 1:1 (w/w) macro-nanodiscs. a) the stacking of 1D  $^1\text{H}$ -NMR spectra in the presence of different concentrations of  $[\text{Gd}^{3+}]$  ions. b), c), d), and e) inversion recovery fitting plots of data for the selected  $^1\text{H}$  peaks at various  $[\text{Gd}^{3+}]$  concentrations.

| $[\text{Gd}^{3+}]$ (mM) | $^1\text{H}$ Peaks |              |          |        |
|-------------------------|--------------------|--------------|----------|--------|
|                         | Aromatic (s)       | $\gamma$ (s) | 4-13 (s) | 14 (s) |
| 0                       | 1.68               | 0.58         | 0.74     | 0.80   |
| 0.0005                  | 1.20               | 0.58         | 0.72     | 0.81   |
| 0.025                   | 0.80               | 0.48         | 0.67     | 0.76   |
| 0.05                    | 0.82               | 0.40         | 0.65     | 0.56   |
| 0.125                   | 0.64               | 0.27         | 0.56     | 0.62   |
| 0.25                    | N/D                | N/D          | N/D      | N/D    |
| 0.5                     | N/D                | N/D          | N/D      | N/D    |
| 1.25                    | N/D                | N/D          | N/D      | N/D    |
| 2.5                     | N/D                | N/D          | N/D      | N/D    |

**Table S1.**  $T_1$  values measured from DMPC:SMA-EA 1:1 (w/w) macro-nanodiscs for varying  $[\text{Gd}^{3+}]$ . Values marked as N/D are data not determined due to significant line-broadening due to the presence of paramagnetic ions.

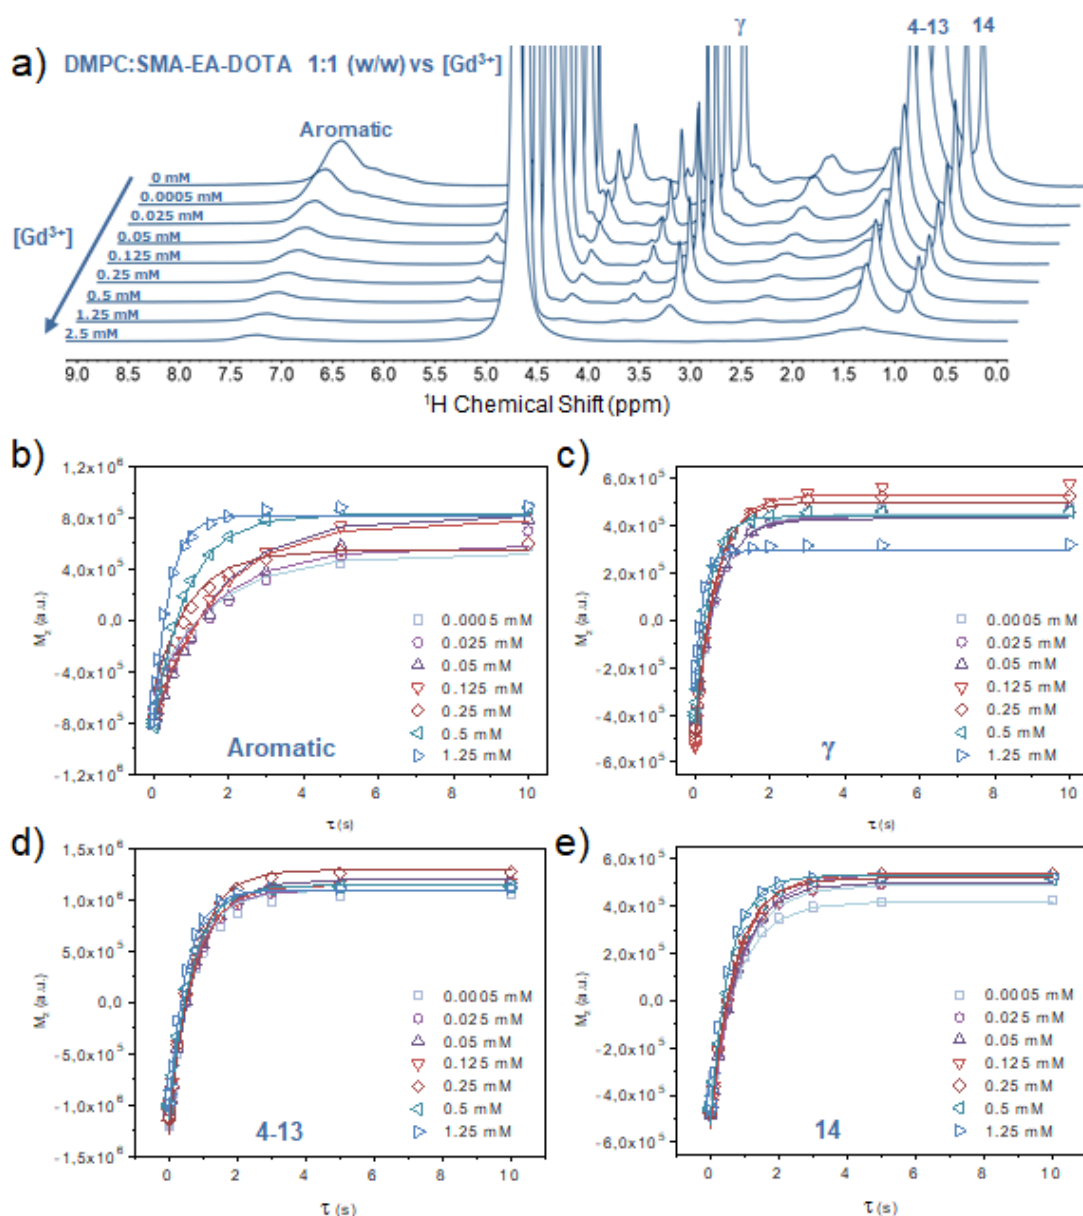

**Figure S7.**  $T_1$  measurements for DMPC: SMA-EA-DOTA 1:1 (w/w) macro-nanodiscs. a) the stacking of 1D  $^1\text{H}$ -NMR spectra in the presence of different concentrations of  $[\text{Gd}^{3+}]$  ions. b), c), d), and e) inversion recovery plots for the selected  $^1\text{H}$  peaks at various  $[\text{Gd}^{3+}]$  concentrations.

| $[\text{Gd}^{3+}]$ (mM) | $^1\text{H}$ Peaks |              |          |        |
|-------------------------|--------------------|--------------|----------|--------|
|                         | Aromatic (s)       | $\gamma$ (s) | 4-13 (s) | 14 (s) |
| 0                       | 1.65               | 0.59         | 0.70     | 0.80   |
| 0.0005                  | 1.70               | 0.60         | 0.70     | 0.85   |
| 0.025                   | 1.70               | 0.58         | 0.67     | 0.83   |
| 0.05                    | 1.70               | 0.56         | 0.77     | 0.87   |
| 0.125                   | 1.70               | 0.53         | 0.72     | 0.79   |
| 0.25                    | 0.97               | 0.49         | 0.70     | 0.76   |
| 0.5                     | 0.89               | 0.35         | 0.65     | 0.70   |
| 1.25*                   | 0.40               | 0.20         | 0.50     | 0.55   |
| 2.5                     | N/D                | N/D          | N/D      | N/D    |

**Table S2.**  $T_1$  values of DMPC: SMA-EA-DOTA 1:1 (w/w) macro nanodiscs for varying  $[\text{Gd}^{3+}]$ .

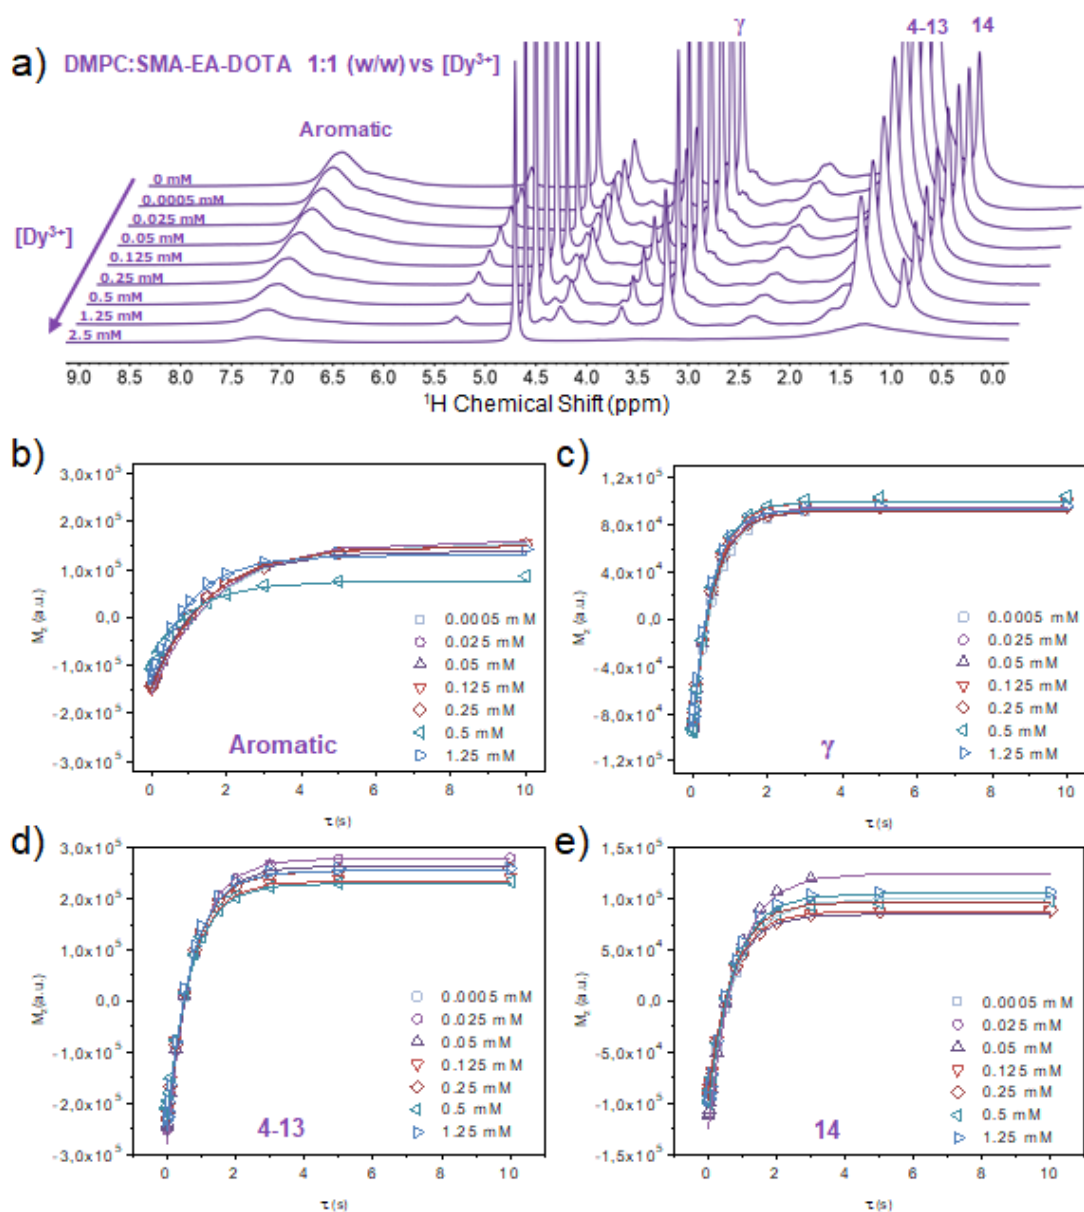

**Figure S8.**  $T_1$  measurements for DMPC: SMA-EA-DOTA 1:1 (w/w) macro-nanodiscs. a) the stacking of 1D  $^1\text{H}$ -NMR spectra in the presence of different concentrations of  $[\text{Dy}^{3+}]$  ions. b), c), d), and e) inversion recovery plots for the selected  $^1\text{H}$  peaks at various  $[\text{Dy}^{3+}]$  concentrations.

| $[\text{Dy}^{3+}]$ (mM) | Peaks        |              |          |        |
|-------------------------|--------------|--------------|----------|--------|
|                         | Aromatic (s) | $\gamma$ (s) | 4-13 (s) | 14 (s) |
| 0                       | 1.65         | 0.59         | 0.70     | 0.80   |
| 0.0005                  | 1.69         | 0.60         | 0.740    | 0.80   |
| 0.025                   | 1.67         | 0.55         | 0.74     | 0.80   |
| 0.05                    | 1.44         | 0.55         | 0.73     | 0.80   |
| 0.125                   | 1.51         | 0.55         | 0.70     | 0.69   |
| 0.25                    | 1.48         | 0.54         | 0.70     | 0.68   |
| 0.5                     | 1.18         | 0.52         | 0.70     | 0.70   |
| 1.25                    | 1.05         | 0.48         | 0.68     | 0.72   |
| 2.5                     | N/D          | N/D          | N/D      | N/D    |

**Table S3.**  $T_1$  values of DMPC: SMA-EA-DOTA 1:1 (w/w) macro nanodiscs for varying  $[\text{Dy}^{3+}]$ .

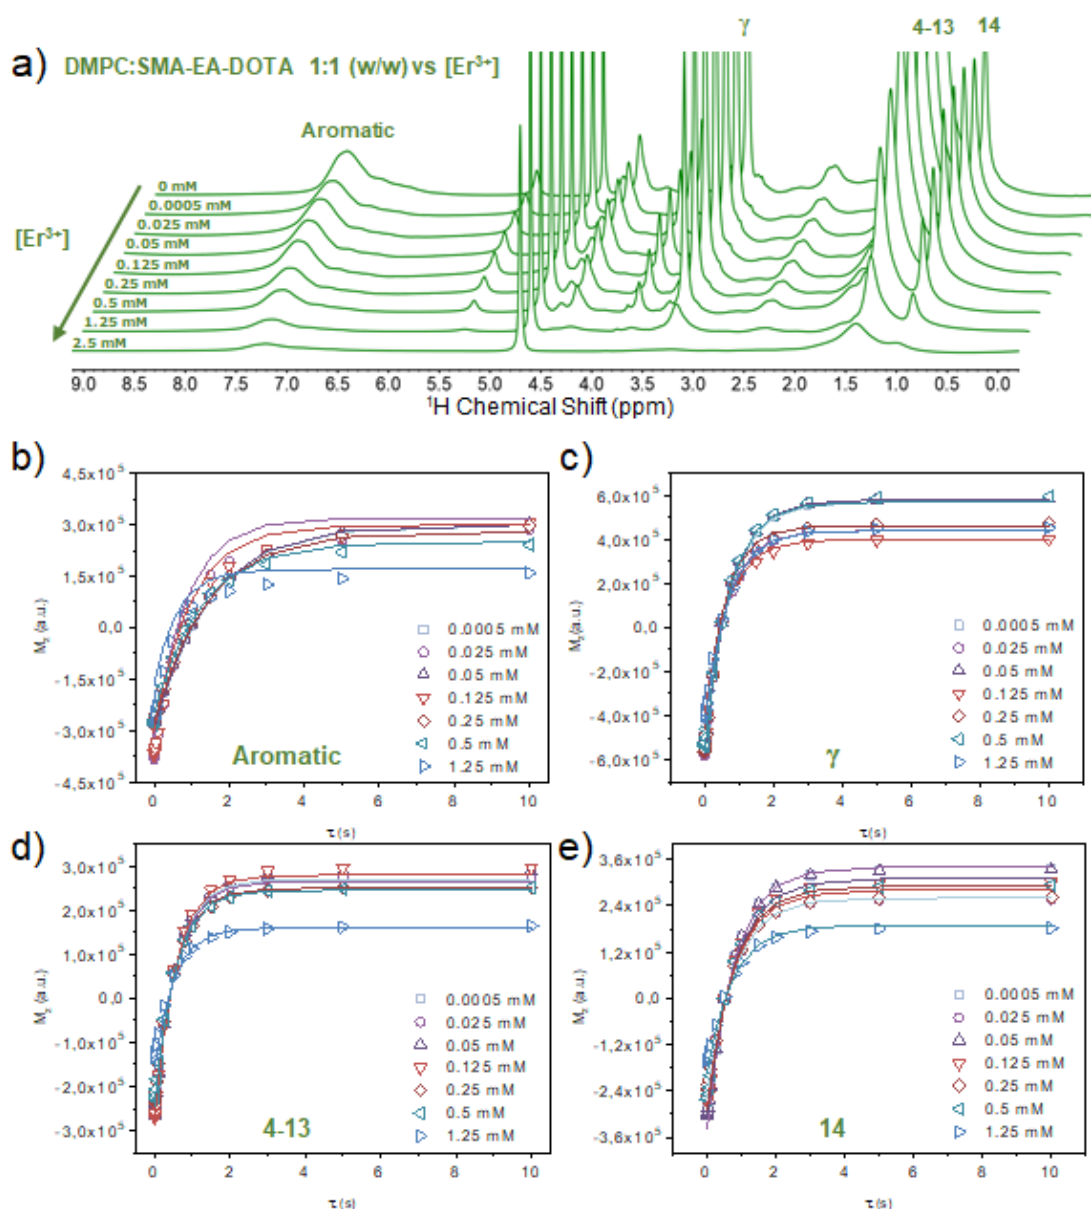

**Figure S9.**  $T_1$  measurements for DMPC: SMA-EA-DOTA 1:1 (w/w) macro-nanodiscs. a) the stacking of 1D  $^1\text{H}$ -NMR spectra in the presence of different concentrations of  $[\text{Er}^{3+}]$  ions. b), c), d), and e) inversion recovery plots for the selected  $^1\text{H}$  peaks at various  $[\text{Er}^{3+}]$  concentrations.

| $[\text{Er}^{3+}]$ (mM) | Peaks        |              |          |        |
|-------------------------|--------------|--------------|----------|--------|
|                         | Aromatic (s) | $\gamma$ (s) | 4-13 (s) | 14 (s) |
| 0                       | 1.65         | 0.59         | 0.70     | 0.80   |
| 0.0005                  | 1.48         | 0.56         | 0.73     | 0.77   |
| 0.025                   | 0.88         | 0.56         | 0.66     | 0.78   |
| 0.05                    | 1.46         | 0.56         | 0.72     | 0.77   |
| 0.125                   | 1.00         | 0.56         | 0.66     | 0.78   |
| 0.25                    | 1.42         | 0.56         | 0.60     | 0.78   |
| 0.5                     | 1.10         | 0.55         | 0.70     | 0.77   |
| 1.25                    | 0.62         | 0.52         | 0.68     | 0.75   |
| 2.5                     | N/D          | N/D          | N/D      | N/D    |

**Table S4.**  $T_1$  values of DMPC: SMA-EA-DOTA 1:1 (w/w) macro nanodiscs for varying  $[\text{Er}^{3+}]$ .

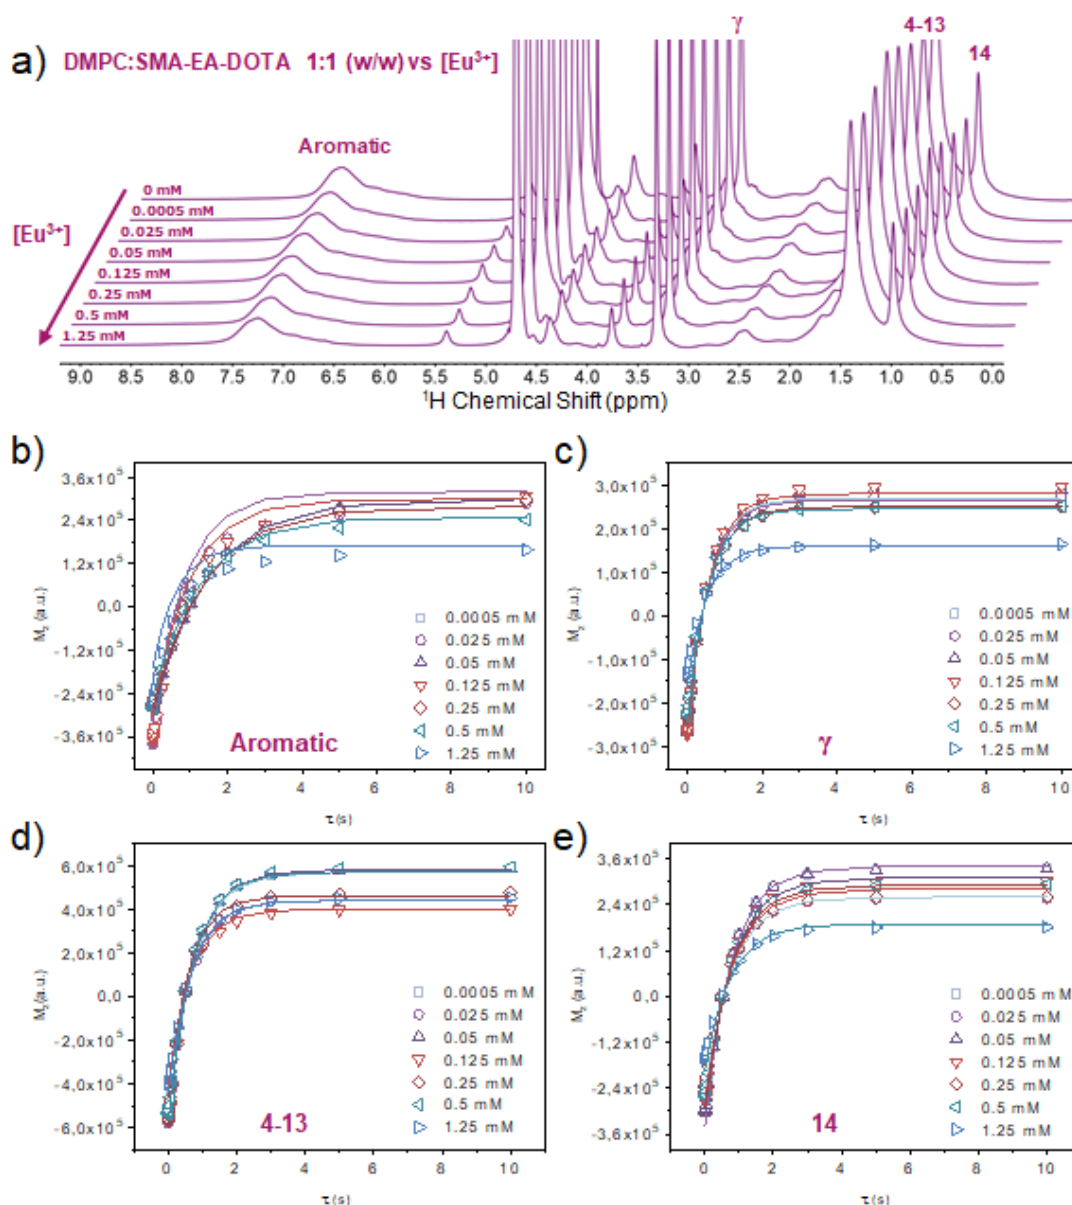

**Figure S10.**  $T_1$  measurements for DMPC: SMA-EA-DOTA 1:1 (w/w) macro-nanodiscs. a) the stacking of 1D  $^1\text{H}$ -NMR spectra in the presence of different concentrations of  $[\text{Eu}^{3+}]$  ions. b), c), d), and e) inversion recovery fitting plots for the selected  $^1\text{H}$  peaks at various  $[\text{Eu}^{3+}]$  concentrations.

| $[\text{Eu}^{3+}]$ (mM) | Peaks        |              |          |        |
|-------------------------|--------------|--------------|----------|--------|
|                         | Aromatic (s) | $\gamma$ (s) | 4-13 (s) | 14 (s) |
| 0                       | 1.65         | 0.59         | 0.70     | 0.80   |
| 0.0005                  | 1.85         | 0.66         | 0.72     | 0.78   |
| 0.025                   | 1.90         | 0.60         | 0.72     | 0.76   |
| 0.05                    | 1.76         | 0.58         | 0.74     | 0.80   |
| 0.125                   | 1.68         | 0.58         | 0.74     | 0.80   |
| 0.25                    | 1.70         | 0.60         | 0.74     | 0.80   |
| 0.5                     | 1.70         | 0.58         | 0.73     | 0.80   |
| 1.25                    | 1.64         | 0.60         | 0.74     | 0.80   |
| 2.5                     | N/D          | N/D          | N/D      | N/D    |

**Table S5.**  $T_1$  values of DMPC: SMA-EA-DOTA 1:1 (w/w) macro nanodiscs for varying  $[\text{Eu}^{3+}]$ .



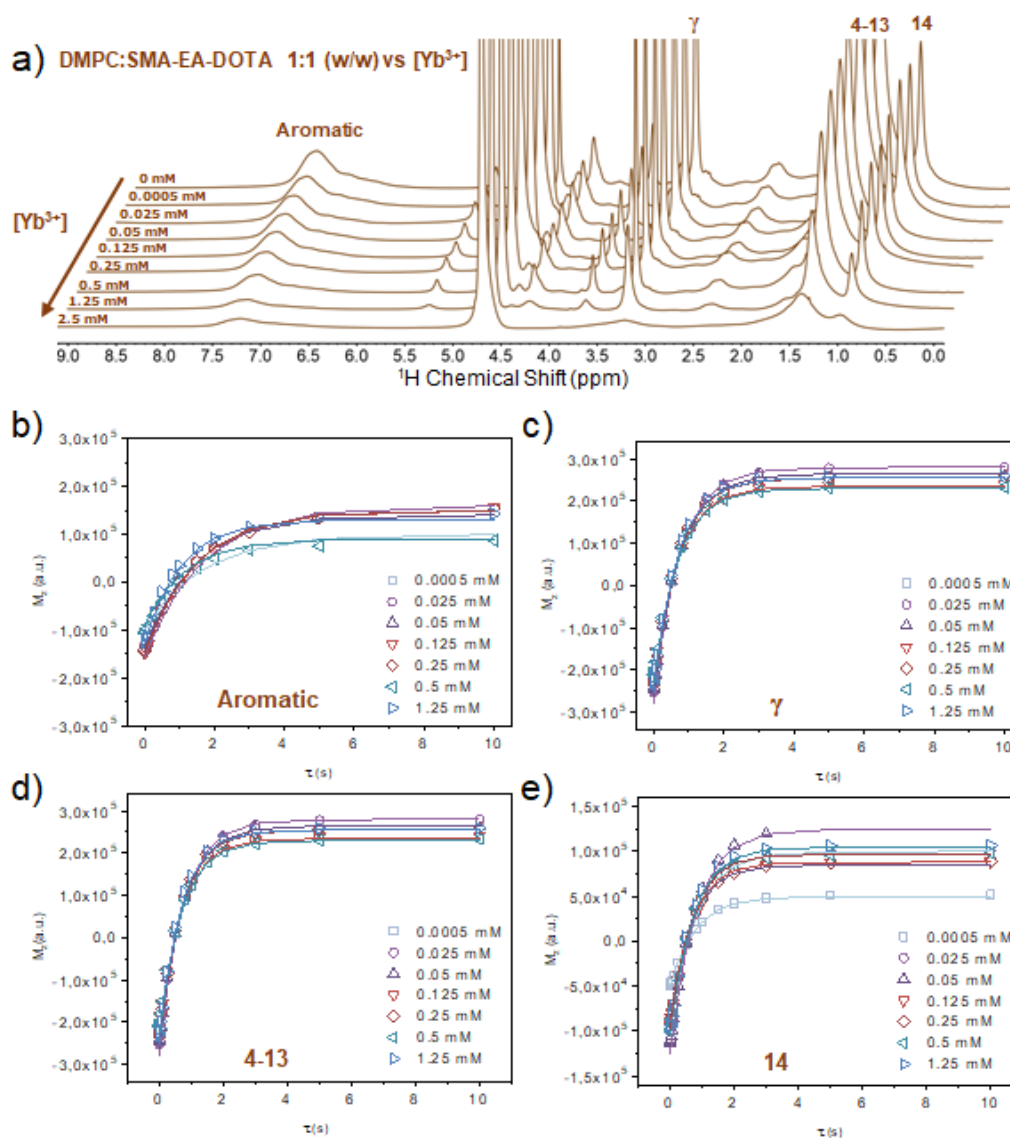

**Figure S11.**  $T_1$  measurements for DMPC: SMA-EA-DOTA 1:1 (w/w) macro-nanodiscs. a) the stacking of 1D  $^1\text{H}$ -NMR spectra in the presence of different concentrations of  $[\text{Yb}^{3+}]$  ions. b), c), d), and e) inversion recovery plots for the selected  $^1\text{H}$  peaks at various  $[\text{Yb}^{3+}]$  concentrations.

| $[\text{Yb}^{3+}]$ (mM) | Peaks        |              |          |        |
|-------------------------|--------------|--------------|----------|--------|
|                         | Aromatic (s) | $\gamma$ (s) | 4-13 (s) | 14 (s) |
| 0                       | 1.65         | 0.59         | 0.70     | 0.80   |
| 0.0005                  | 1.78         | 0.58         | 0.73     | 0.78   |
| 0.025                   | 1.78         | 0.58         | 0.73     | 0.78   |
| 0.05                    | 1.74         | 0.58         | 0.73     | 0.80   |
| 0.125                   | 1.72         | 0.58         | 0.72     | 0.80   |
| 0.25                    | 1.72         | 0.57         | 0.73     | 0.78   |
| 0.5                     | 1.67         | 0.57         | 0.72     | 0.79   |
| 1.25                    | 1.66         | 0.54         | 0.71     | 0.77   |
| 2.5                     | N/D          | N/D          | N/D      | N/D    |

**Table S6.**  $T_1$  values of DMPC: SMA-EA-DOTA 1:1 (w/w) macro nanodiscs for varying  $[\text{Yb}^{3+}]$ .

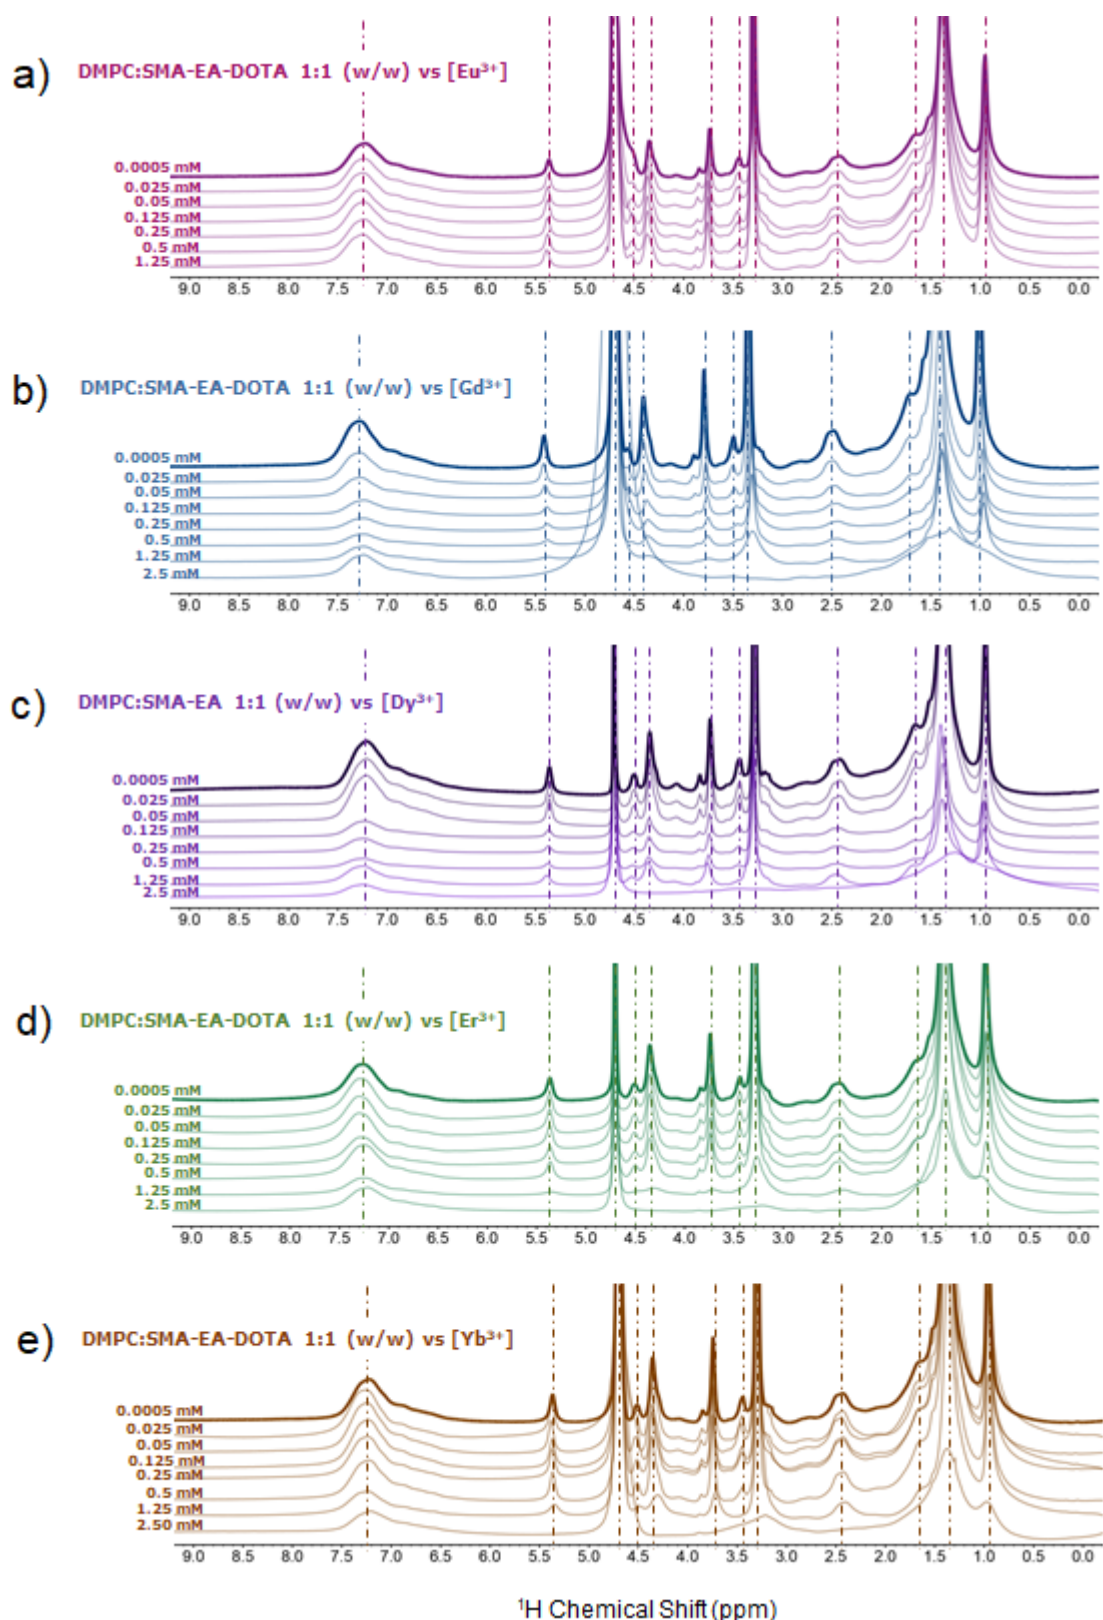

**Figure S12. NMR spectra of SMA-EA-DOTA in the presence of paramagnetic metals.** Stacking of 1D <sup>1</sup>H-NMR of DMPC: SMA-EA-DOTA 1:1 (w/w) macro-nanodiscs in the presence of different Ln<sup>3+</sup> ions. Lanthanide trivalent ions such as Eu<sup>3+</sup>, Gd<sup>3+</sup>, Dy<sup>3+</sup>, Er<sup>3+</sup>, Yb<sup>3+</sup> are respectively shown in a), b), c), d), and e).

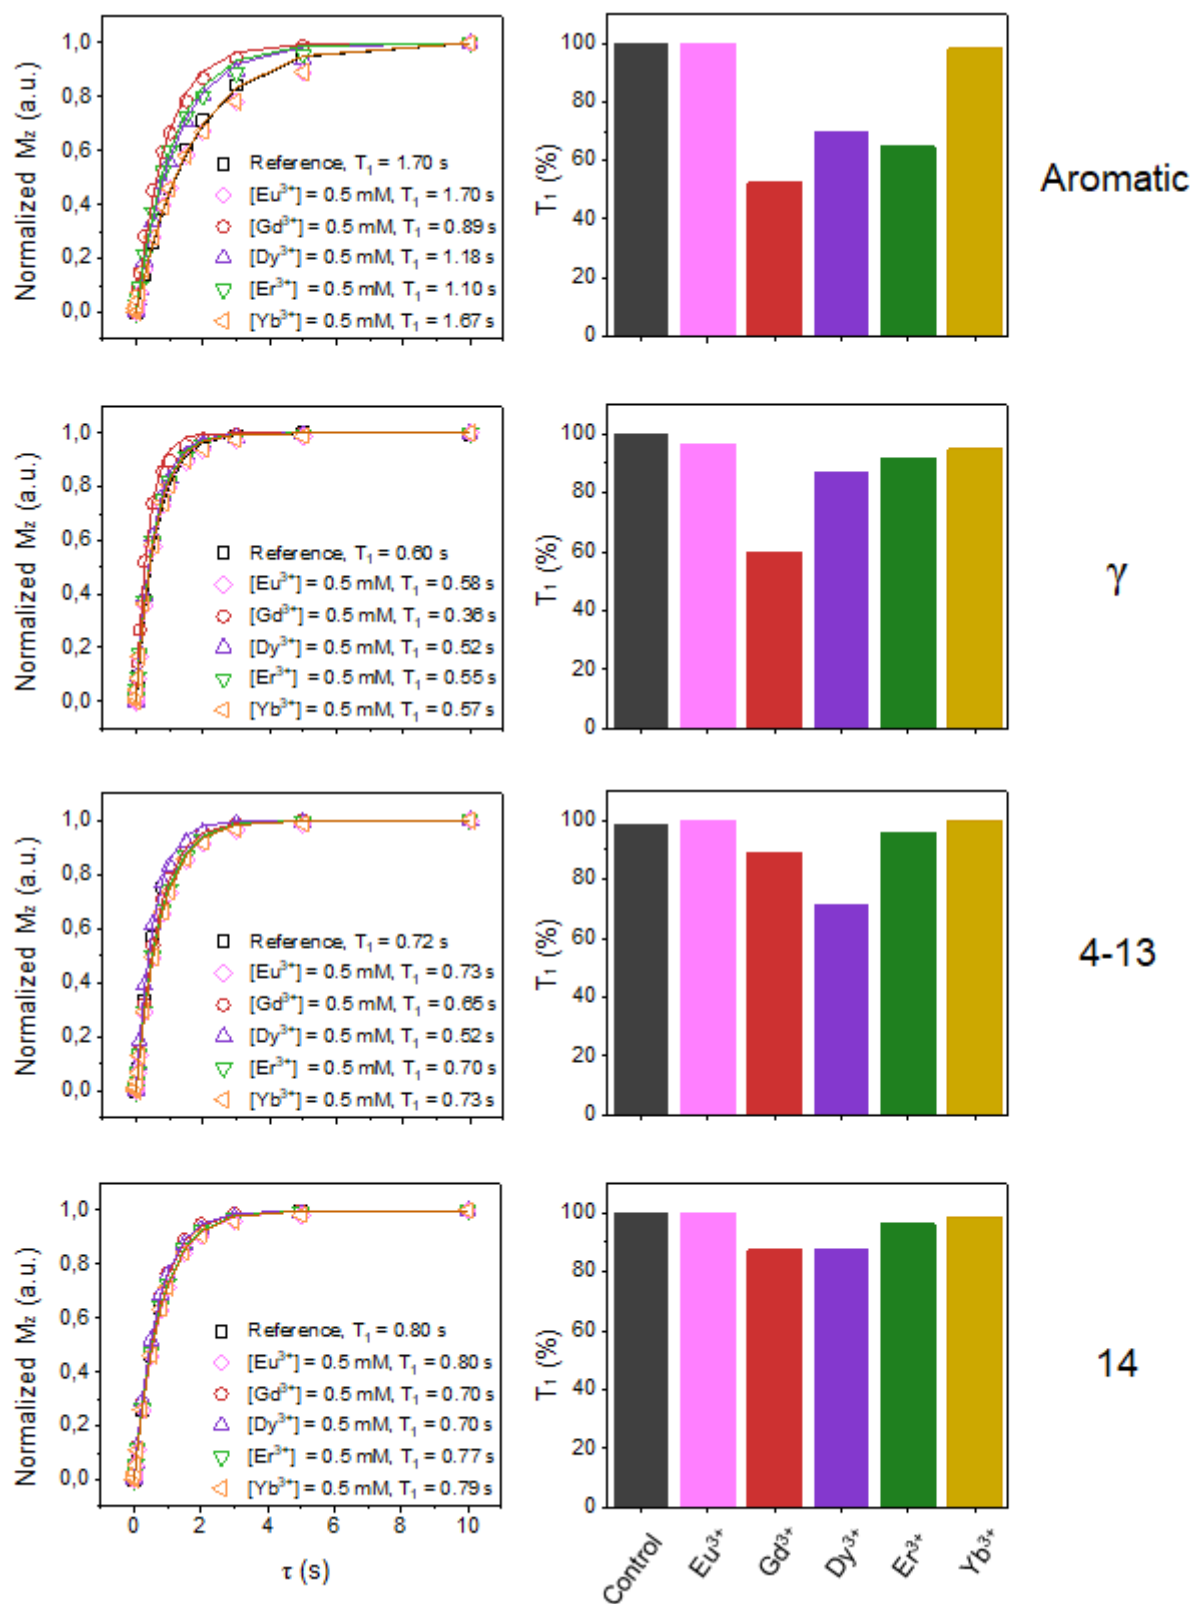

**Figure S13.** Normalized fitting (left panel) and normalized  $T_1$  values (right panel) for DMPC: SMA-EA-DOTA 1:1 (w/w) macro-nanodiscs in the presence of 0.5 M  $\text{Ln}^{3+}$ . From top to bottom data relative to the aromatic, gamma, 2-13, and 14 1H peaks.
